# Supplementary material for: Differences in Acid Stress Response of Lacticaseibacillus paracasei Zhang Cultured from Solid-State Fermentation and Liquid-State Fermentation
Source: MDPI journal article supplement (doi:10.3390/microorganisms9091951), 2021-09-14
Supplement: s1 [file s1]

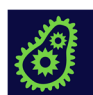

## Supplementary Material

Table S1. Number of reads before and after trimming.

| Samples | Total raw reads<br>(M) | Total clean reads<br>(M) | Total clean bases<br>(Gb) |
|---------|------------------------|--------------------------|---------------------------|
| SSF-1   | 21.93                  | 21.45                    | 1.07                      |
| SSF-2   | 21.93                  | 21.50                    | 1.07                      |
| SSF-3   | 21.94                  | 21.56                    | 1.08                      |
| LSF-1   | 21.94                  | 21.01                    | 1.05                      |
| LSF-2   | 21.84                  | 21.10                    | 1.05                      |
| LSF-3   | 21.94                  | 21.04                    | 1.05                      |

Table S2. Information of read alignment against the reference genome and genes.

| Samples | Alignment against reference genome |                         |                            | Alignment against reference genes |                         |                            |
|---------|------------------------------------|-------------------------|----------------------------|-----------------------------------|-------------------------|----------------------------|
|         | Total<br>clean reads<br>(M)        | Total<br>mapping<br>(%) | Uniquely<br>mapping<br>(%) | Total<br>clean reads<br>(M)       | Total<br>mapping<br>(%) | Uniquely<br>mapping<br>(%) |
| SSF-1   | 21.45                              | 99.19                   | 96.77                      | 21.45                             | 75.95                   | 75.57                      |
| SSF-2   | 21.50                              | 99.23                   | 97.16                      | 21.50                             | 76.05                   | 75.75                      |
| SSF-3   | 21.56                              | 99.35                   | 97.80                      | 21.56                             | 76.63                   | 76.28                      |
| LSF-1   | 21.01                              | 97.17                   | 95.78                      | 21.01                             | 78.67                   | 78.24                      |
| LSF-2   | 21.10                              | 98.09                   | 96.56                      | 21.10                             | 78.45                   | 77.99                      |
| LSF-3   | 21.04                              | 98.60                   | 97.33                      | 21.04                             | 82.43                   | 82.00                      |

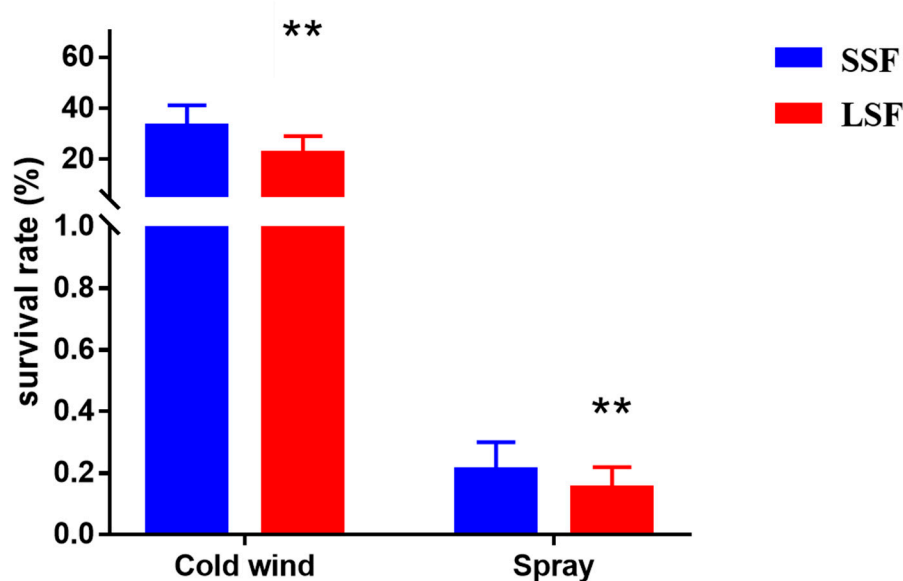

Figure S1. Survival rates of *L. paracasei* Zhang after spray drying and cold-air drying. \*\*, statistically significant differences determined by Student's *t*-test ( $P < 0.01$ ).

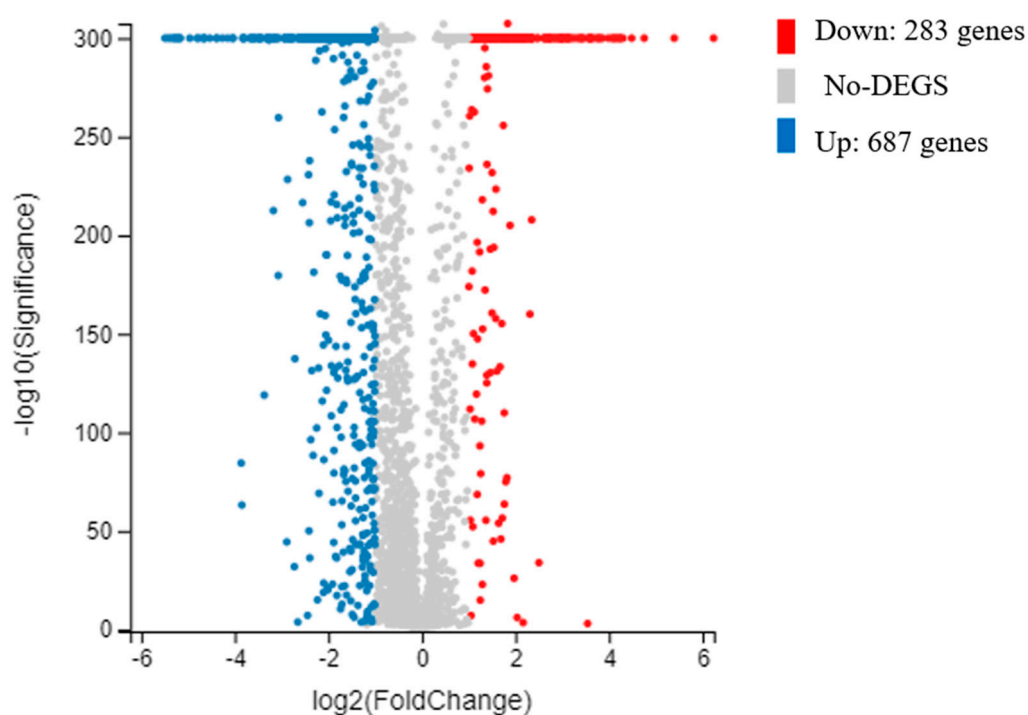

**Figure S2.** Volcano map of differentially expressed genes in the bacteria obtained by solid state fermentation and liquid state fermentation. Every point represents one gene. The blue points represent significantly down-regulated genes and red points represent significantly up-regulated genes.

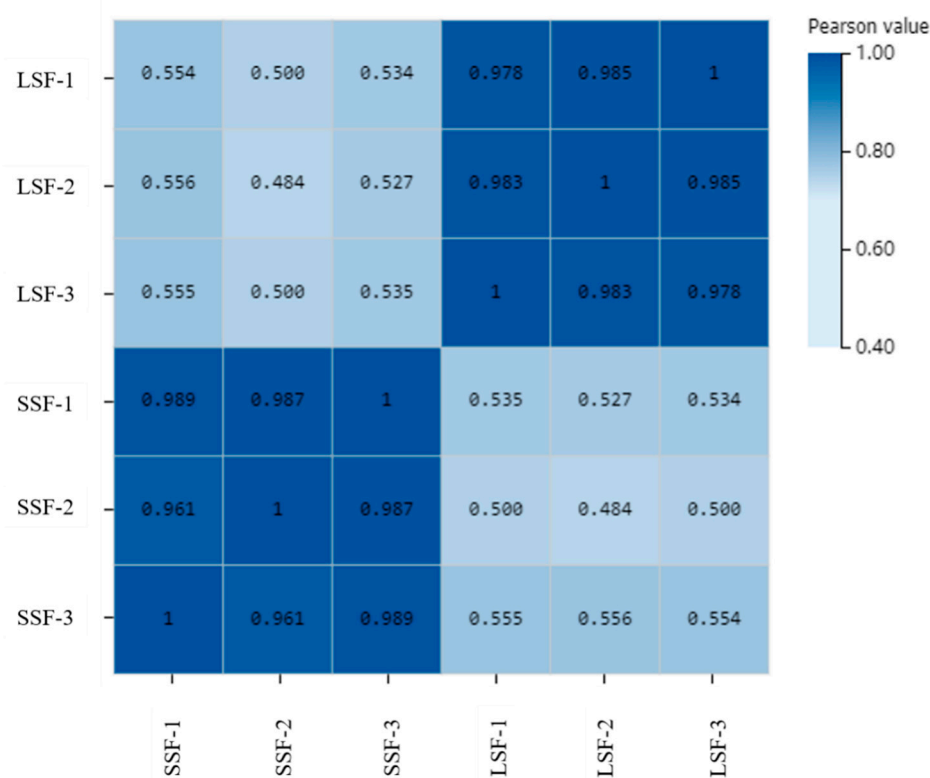

**Figure S3.** Pearson correlation between samples.

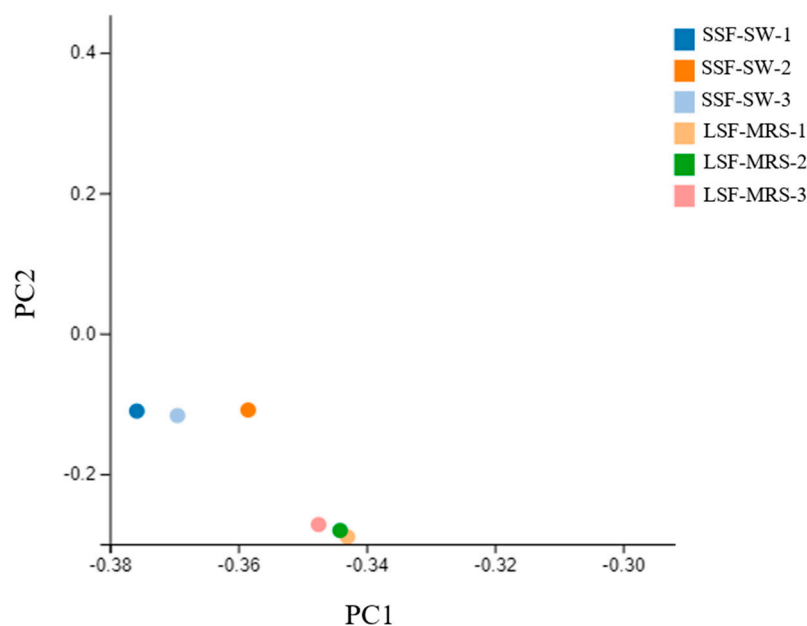

**Figure S4.** Principal component analysis (PCA) between samples.

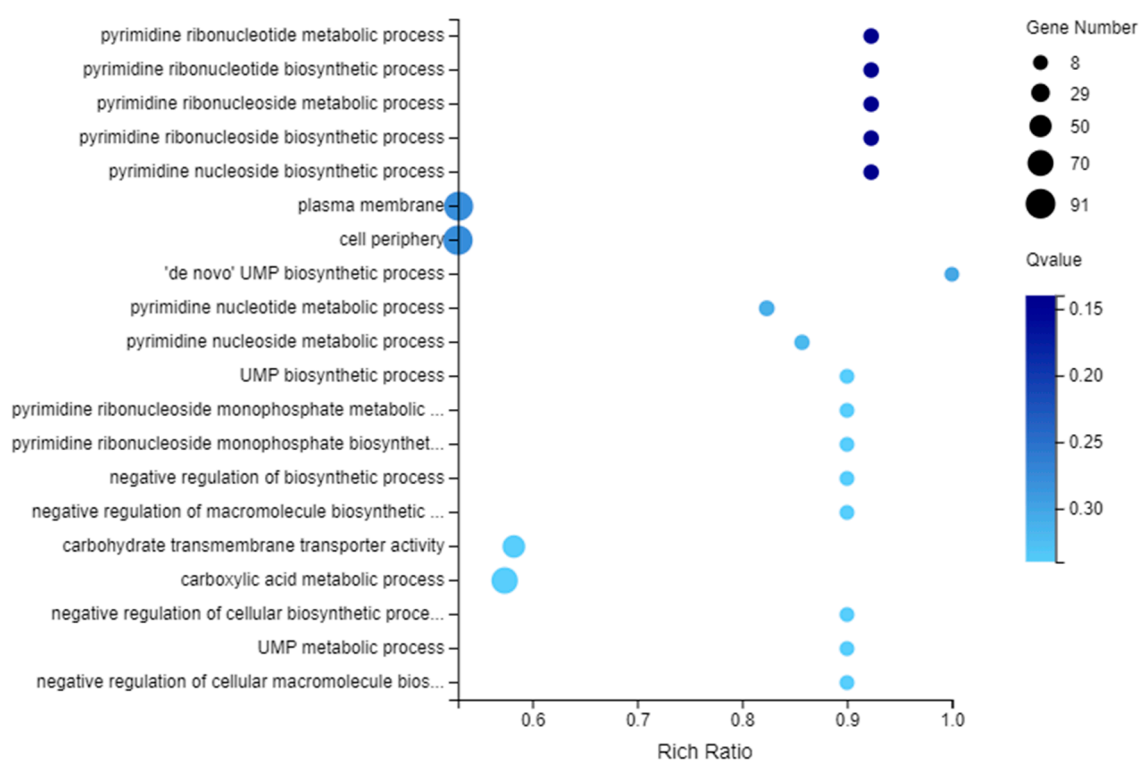

**Figure S5.** GO enrichment analysis of DEGs in *L. paracasei* Zhang (SSF Vs LSF).

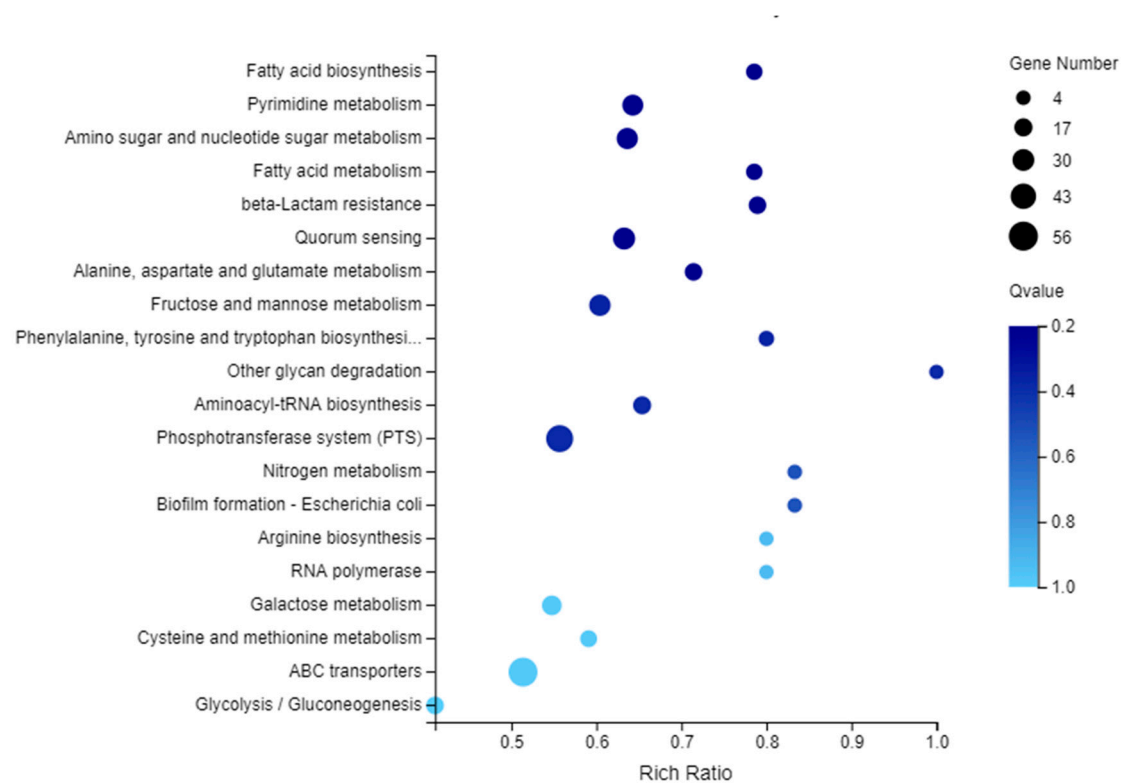

**Figure S6.** KEGG pathway analysis of DEGs in *L. paracasei* Zhang (SSF Vs LSF).
