# Supplementary material for: Differences in Acid Stress Response of Lacticaseibacillus paracasei Zhang Cultured from Solid-State Fermentation and Liquid-State Fermentation
Source: Microorganisms. 2021 Sep 14;9(9):1951. doi: 10.3390/microorganisms9091951 (PMC8465097; doi:10.3390/microorganisms9091951)
Supplement: Supplementary file 1 [file microorganisms-09-01951-s001.zip › Table S3.xlsx]

## Sheet: Sheet1
Table S3 Genes differentially expressed at the transcriptional level in L. paracasei Zhang cultured from solid-state fermentation and liquid-state fermentation
Gene ID	Gene name	log2(JC/G)	Fold change	Description	Remark
Carbohydrate transport
LCAZH_RS02385	manX	-5.30838	39.6263	mannose-specific IIB component	mannose transport down-regulated
LCAZH_RS02390	manY	-4.96058	31.1374	mannose-specific IIC component
LCAZH_RS02395	manZ	-4.53219	23.1379	mannose-specific IID
LCAZH_RS02405	manX	-3.17149	9.00976	mannose-specific IIA
LCAZH_RS01840	manX	-1.51408	2.85617	mannose-specific IIB
LCAZH_RS01845	manY	-1.45212	2.7361	mannose-specific IIC component
LCAZH_RS01810	manA	-1.37808	2.59922	mannose-6-phosphate isomerase
LCAZH_RS01850	manZ	-1.17179	2.25291	mannose-specific IID
LCAZH_RS14310	manX	-1.00392	2.00544	mannose-specific IIA component
LCAZH_RS10825	bglA	-5.28	38.8542	6-phospho-beta-glucosidase	cellobiose transport down-regulated
LCAZH_RS08990	celA	-3.17268	9.01717	cellobiose-specific IIB component
LCAZH_RS08985	celC	-3.06978	8.39648	cellobiose-specific IIA component
LCAZH_RS08975	celB	-2.87661	7.34424	PTS system, cellobiose-specific IIC
LCAZH_RS01915	celC	-2.32383	5.0066	PTS system, cellobiose-specific IIA
LCAZH_RS01910	celA	-1.87784	3.67525	PTS system, cellobiose-specific IIB
LCAZH_RS01905	celB	-1.67124	3.18488	PTS system, cellobiose-specific IIC
LCAZH_RS02610	celC	-1.49046	2.80978	PTS system, cellobiose-specific IIA
LCAZH_RS02620	celA	-1.25531	2.38718	PTS system, cellobiose-specific IIB
LCAZH_RS01730	celB	-1.05136	2.07249	PTS system, cellobiose-specific IIC
LCAZH_RS02615	celB	-1.01475	2.02055	PTS system, cellobiose-specific IIC
LCAZH_RS02605	bglA	-1.59	3.01049	6-phospho-beta-glucosidase
LCAZH_RS08970	bglA	-1.88	3.68075	6-phospho-beta-glucosidase
LCAZH_RS13490	glvA	-3.6784	12.8029	maltose-6'-phosphate glucosidase	maltose/glucose transport down-regulated
LCAZH_RS13495	malX	-3.24499	9.48068	PTS system, maltose/glucose-specific IIB
LCAZH_RS13495	malX	-3.24499	9.48068	PTS system, maltose/glucose-specific IIB
LCAZH_RS05510	galU	-1.59579	3.02261	UTP--glucose-1-phosphate uridylyltransferase
LCAZH_RS10030	rfbB	-1.30227	2.46616	dTDP-glucose 4,6-dehydratase
LCAZH_RS05695	pgi	-1.24403	2.3686	glucose-6-phosphate isomerase
LCAZH_RS13725	srlA	-2.2758	4.84265	PTS system, glucitol/sorbitol-specific IIC	glucitol/sorbitol transport down-regulated
LCAZH_RS13720	srlE	-2.15756	4.46161	PTS system, glucitol/sorbitol-specific IIB
LCAZH_RS13715	srlB	-2.03657	4.1027	PTS system, glucitol/sorbitol-specific IIA
LCAZH_RS13725	srlA	-2.2758	4.84265	PTS system, glucitol/sorbitol-specific IIC
LCAZH_RS13720	srlE	-2.15756	4.46161	PTS system, glucitol/sorbitol-specific IIB
LCAZH_RS13715	srlB	-2.03657	4.1027	PTS system, glucitol/sorbitol-specific IIA
LCAZH_RS01865	srlD	-2.00182	4.00505	sorbitol-6-phosphate 2-dehydrogenase
LCAZH_RS13740	srlD	-1.26384	2.40135	sorbitol-6-phosphate 2-dehydrogenase
LCAZH_RS01190	fbaA	-3.07874	8.44875	fructose-bisphosphate aldolase, class II	fructose transport down-regulated
LCAZH_RS01235	xfp	-2.85459	7.23298	Microbial metabolism in diverse environments
LCAZH_RS05025	glmS	-2.63498	6.21165	glucosamine-fructose-6-phosphate aminotransferase
LCAZH_RS04740	tpiA	-1.92602	3.80005	triosephosphate isomerase (TIM)
LCAZH_RS13790	fruA	-1.58489	2.99986	PTS system, fructose-specific IIC
LCAZH_RS06800	fruB	-1.55698	2.94237	PTS system, fructose-specific IIA
LCAZH_RS10010	fbp3	-1.40013	2.63925	fructose-1,6-bisphosphatase III
LCAZH_RS13795	fruA	-1.26157	2.39756	PTS system, fructose-specific IIB
LCAZH_RS13800	fruB	-1.10609	2.15261	PTS system, fructose-specific IIA
LCAZH_RS00855	scrA	-1.95	3.86375	PTS system, sucrose-specific IIA component	sucrose transport down-regulated
LCAZH_RS14550	mtlD	-1.45824	2.74773	mannitol-1-phosphate 5-dehydrogenase	mannitol transport down-regulated
LCAZH_RS14555	mtlA	-1.46374	2.75822	PTS system, mannitol-specific IIA
LCAZH_RS14565	mtlA	-1.27801	2.42504	PTS system, mannitol-specific IIB
LCAZH_RS02105	frdA	-5.3689	41.3238	citrate lyase subunit alpha / citrate CoA-transferase	citrate transport down-regulated
LCAZH_RS09390	citF	-5.16757	35.9412	citrate lyase subunit beta / citryl-CoA lyase
LCAZH_RS09395	citE	-4.80767	28.006	citrate lyase subunit gamma (acyl carrier protein)
LCAZH_RS09400	citD	-4.67732	25.5867	[citrate (pro-3S)-lyase] ligase
LCAZH_RS09405	citC	-2.52454	5.75391	fumarate reductase flavoprotein subunit
LCAZH_RS13770	ulaB	-1.93738	3.83011	ascorbate-specific IIB component	ascorbate transport down-regulated
LCAZH_RS13775	ulaA	-1.68175	3.20816	ascorbate-specific IIC component
LCAZH_RS13780	ulaC	-1.64863	3.13535	ascorbate-specific IIA component
LCAZH_RS03260	lacA	3.20237	-9.2047	galactose-6-phosphate isomerase	galactose/galactitol transport up-regulated
LCAZH_RS03255	lacD	3.08111	-8.46266	tagatose 1,6-diphosphate aldolase
LCAZH_RS03265	lacB	3.00748	-8.04157	galactose-6-phosphate isomerase
LCAZH_RS03190	galK	2.10966	-4.31589	galactokinase
LCAZH_RS13330	gatC	1.84139	-3.58356	PTS system, galactitol-specific IIC component
LCAZH_RS03250	lacC	1.83559	-3.56917	tagatose 6-phosphate kinase
LCAZH_RS13340	gatA	1.54283	-2.91365	PTS system, galactitol-specific IIA component
LCAZH_RS13335	gatB	1.52515	-2.87817	PTS system, galactitol-specific IIB component
LCAZH_RS03195	galE	1.49279	-2.81433	UDP-glucose 4-epimerase
LCAZH_RS03200	galT	1.46045	-2.75194	UDPglucose--hexose-1-phosphate uridylyltransferase
Glycolysis
LCAZH_RS01190	fbaA	-3.07874	8.44875	fructose-bisphosphate aldolase, class II	glycolysis transport down-regulated
LCAZH_RS04740	tpiA	-1.92602	3.80005	fructose-bisphosphate aldolase, class II
LCAZH_RS04735	pgk	-1.51344	2.8549	phosphoglycerate kinase
LCAZH_RS11600	ppdK	-1.51	2.8481	pyruvate, orthophosphate dikinase
LCAZH_RS10010	fbp3	-1.40013	2.63925	fructose-1,6-bisphosphatase III
LCAZH_RS08580	gpmA	-1.32756	2.50978	2,3-bisphosphoglycerate-dependent phosphoglycerate mutase
LCAZH_RS05695	pgi	-1.24403	2.3686	glucose-6-phosphate isomerase
LCAZH_RS10555	gpmA	-1.05196	2.07334	2,3-bisphosphoglycerate-dependent phosphoglycerate mutase
Pentose phosphate pathway
LCAZH_RS01560	gnd	-3.24068	9.45238	6-phosphogluconate dehydrogenase	pentose phosphate pathway down-regulated
LCAZH_RS12820	prsA	-1.51002	2.84814	ribose-phosphate pyrophosphokinase
LCAZH_RS11495	rpiA	-1.21576	2.32264	ribose 5-phosphate isomerase A
LCAZH_RS08475	gnd	-1.10347	2.14871	6-phosphogluconate dehydrogenase
Pyruvate metabolism
LCAZH_RS01175	ackA	-5.21331	37.0991	acetate kinase	pyruvate metabolism down-regulated
LCAZH_RS02105	frdA	-4.77584	27.395	fumarate reductase flavoprotein subunit
LCAZH_RS09415	oadB	-3.65	12.5533	oxaloacetate decarboxylase, beta subunit
LCAZH_RS02980	ldh	-2.52454	5.75391	L-lactate dehydrogenase
LCAZH_RS04900	pta	-1.96089	3.89302	phosphate acetyltransferase
LCAZH_RS07120	pflD	-1.51414	2.85628	formate C-acetyltransferase
LCAZH_RS11600	ppdK	-1.51	2.8481	orthophosphate dikinase
LCAZH_RS09370	oadA	-1.14847	2.21679	oxaloacetate decarboxylase, alpha subunit
LCAZH_RS09375	oadA	-1.01096	2.01525	oxaloacetate decarboxylase, alpha subunit
Inositol phosphate metabolism
LCAZH_RS04740	tpiA	-1.92602	3.80005	triosephosphate isomerase (TIM)	Inositol phosphate metabolism down-regulated
LCAZH_RS01545	iolJ	-1.4154	2.66735	6-phospho-5-dehydro-2-deoxy-D-gluconate aldolase
LCAZH_RS01520	iolC	-1.23007	2.34578	5-dehydro-2-deoxygluconokinase
LCAZH_RS01515	iolB	-1.1084	2.15607	5-deoxy-glucuronate isomerase
LCAZH_RS01540	iolE	-1.10367	2.149	inosose dehydratase
LCAZH_RS01525	iolD	-1.0857	2.1224	3D-(3,5/4)-trihydroxycyclohexane-1,2-dione acylhydrolase
LCAZH_RS01510	iolA	-1.00342	2.00475	malonate-semialdehyde dehydrogenase
Fatty acid biosynthesis
LCAZH_RS10410	accA	2.68251	-6.41973	acetyl-CoA carboxylase carboxyl transferase subunit alpha	fatty acid biosynthesis up-regulated
LCAZH_RS10465	fabH	2.73503	-6.65775	3-oxoacyl-[acyl-carrier-protein] synthase III
LCAZH_RS10455	fabK	2.7372	-6.66773	enoyl-[acyl-carrier protein] reductase II
LCAZH_RS10415	accD	2.94195	-7.68447	acetyl-CoA carboxylase carboxyl transferase subunit beta
LCAZH_RS10475	fabZ	2.97947	-7.88696	3-hydroxyacyl-[acyl-carrier-protein] dehydratase
LCAZH_RS10425	accC	2.99164	-7.95376	acetyl-CoA carboxylase, biotin carboxylase subunit
LCAZH_RS10435	accB	3.32729	-10.0372	acetyl-CoA carboxylase biotin carboxyl carrier protein
LCAZH_RS10430	fabZ	3.37743	-10.3922	3-hydroxyacyl-[acyl-carrier-protein] dehydratase
LCAZH_RS10450	fabD	3.60991	-12.2093	[acyl-carrier-protein] S-malonyltransferase
LCAZH_RS10445	fabG	3.62578	-12.3443	3-oxoacyl-[acyl-carrier protein] reductase
LCAZH_RS10440	fabF	3.86796	-14.6006	3-oxoacyl-[acyl-carrier-protein] synthase II
Amino acid metabolism
LCAZH_RS05025	glmS	-2.63498	6.21165	glucosamine-fructose-6-phosphate aminotransferase	glutamate metabolism down-regulated
LCAZH_RS07335	carB	-2.61966	6.14607	carbamoyl-phosphate synthase large subunit
LCAZH_RS08330	glnA	-2.49238	5.62705	glutamine synthetase
LCAZH_RS07340	carA	-2.40969	5.31359	carbamoyl-phosphate synthase small subunit
LCAZH_RS11170	ansAB	-1.44083	2.71477	L-asparaginase
LCAZH_RS02560	glnA	-1.2148	2.32108	glutamine synthetase
LCAZH_RS12650	gltD	3.60437	-12.1625	glutamate synthase (NADPH/NADH) small chain	glutamate metabolism up-regulated
LCAZH_RS12660	gltB	3.59172	-12.0564	glutamate synthase (NADPH/NADH) large chain
LCAZH_RS02990	gdhA	1.85754	-3.6239	glutamate dehydrogenase (NADP+)
Quorum-sensing
LCAZH_RS01240	oppA	3.14414	-8.84059	oligopeptide transport system substrate-binding protein	quorum-sensing up-regulated
LCAZH_RS03255	lacD	3.08111	-8.46266	tagatose 1,6-diphosphate aldolase
LCAZH_RS12310	secY	2.14767	-4.43111	preprotein translocase subunit SecY
LCAZH_RS10200	oppA	1.72838	-3.31355	oligopeptide transport system substrate-binding protein
LCAZH_RS08110	ABC.PE.A1	1.50007	-2.82856	peptide/nickel transport system ATP-binding protein
LCAZH_RS10180	oppF	1.47301	-2.776	oligopeptide transport system ATP-binding protein
LCAZH_RS08115	ABC.PE.A	1.44841	-2.72907	peptide/nickel transport system ATP-binding protein
LCAZH_RS10195	oppB	1.44694	-2.72629	oligopeptide transport system permease protein
LCAZH_RS10185	oppD	1.43726	-2.70806	oligopeptide transport system ATP-binding protein
LCAZH_RS01935	oppA	1.39239	-2.62513	oligopeptide transport system substrate-binding protein
LCAZH_RS10190	oppC	1.27606	-2.42177	oligopeptide transport system permease protein
LCAZH_RS08105	ABC.PE.P	1.2007	-2.29851	peptide/nickel transport system permease protein
Acid stress-tolerance
LCAZH_RS02995	cspA	2.86522	-7.28647	cold shock protein (beta-ribbon, CspA family)	acid stress-tolerance up-regulated
LCAZH_RS07935	rimP	1.36731	-2.57989	ribosome maturation factor RimP
LCAZH_RS07910	rbfA	1.33931	-2.5303	ribosome-binding factor A
LCAZH_RS00735	mazF	1.16873	-2.24814	mRNA interferase MazF
LCAZH_RS06485	cspA	1.09948	-2.14277	cold shock protein (beta-ribbon, CspA family)
LCAZH_RS14570	nagB	1.05534	-2.07821	glucosamine-6-phosphate deaminase
